# Supplementary material for: Crystallisation temperature control of stoichiometry and selectivity in host–guest compounds
Source: Royal Society of Chemistry journal article supplement (doi:10.1039/c7ce01414g), 2017-01-01
Supplement: c7ce01414g2.pdf [file c7ce01414g2.pdf]

## Electronic Supplementary Information

### Crystallisation Temperature Control of Stoichiometry and Selectivity in Host-Guest Compounds

Nicole M. Sykes, Hong Su, Edwin Weber, Susan A. Bourne and Luigi R. Nassimbeni

#### Table of Contents

|                                                                         |    |
|-------------------------------------------------------------------------|----|
| 1. Methods and Materials.....                                           | 1  |
| 2. X-ray Crystallography .....                                          | 1  |
| 3. <sup>1</sup> H Nuclear Magnetic Resonance (NMR) Spectroscopy .....   | 2  |
| 4. Hydrogen Bonding .....                                               | 3  |
| 5. Structure diagrams .....                                             | 4  |
| 6. Apohost Composition .....                                            | 5  |
| 7. Packing comparisons between structures 1, 3 and 6 .....              | 6  |
| 8. Lattice Energy .....                                                 | 7  |
| 9. Representative Inclusion Experiments .....                           | 8  |
| 10. Hirshfeld Analysis.....                                             | 18 |
| 11. Kinetics of <i>In Situ</i> PXRD Vapour Sorption (Experiment 1)..... | 23 |
| 12. Relevant Thermal Analysis.....                                      | 23 |

#### 1. Materials and Methods

The host compound 9,9'-(ethyne-1,2-diyl)bis(fluoren-9-ol), **H** was synthesized by Weber<sup>1</sup> and used without further purification. The alcohol guests were purchased from Sigma Aldrich and used as received. Single crystals of the inclusion compounds were obtained by dissolving **H** in chloroform and adding an excess of the guest or binary guest mixture. The resulting solutions were filtered and allowed to crystallise at various temperatures. Heating mantles were used to achieve the temperatures of +30°C and +50 and vials were left open to slowly evaporate. This is acceptable given that the vapour pressures of the two guests are so similar; at 20°C the vapour pressure of 2-propanol is 4.24 kPa and that of tertiary butanol is 3.98 kPa. At the lower temperatures vials were capped and sealed with parafilm; +5°C and -20°C were realised by using a standard fridge and freezer. The low temperatures of -41°C and -61°C were achieved by allowing solutions to crystallise in a slurry of acetonitrile/dry ice and chloroform/dry ice respectively.

#### 2. X-ray Crystallography

Single crystal X-ray diffraction data were collected on a Bruker DUO APEX II<sup>2</sup> diffractometer for all structures using Mo K $\alpha$  ( $\lambda$  = 0.71073 Å) at a temperature of 153 K. The intensity data were collected using the phi scan and omega scan techniques, scaled and reduced with

SAINT-Plus.<sup>3</sup> The correction of the collected intensities for absorption was done using the SADABS program.<sup>4</sup>

The structures were solved by direct methods using SHELX-97<sup>5</sup> and refined using full-matrix least squares methods in SHELXL.<sup>5</sup> The graphical interface used was the program X-SEED.<sup>6</sup> All C-H hydrogen atoms were placed geometrically and with a riding model for their isotropic temperature factors. The O-H hydrogen atoms were located in the final difference electron density map. Their bond lengths were fixed using the formulae suggested by Lusi and Barbour<sup>7</sup> who studied the neutron data of the O-H...O systems. Diagrams were generated using MERCURY (3.9).<sup>8</sup>

Powders were mounted on a flat zero-background sample holder. X-ray powder data were collected in a Bruker D8 Advance X-ray diffractometer with copper radiation (Cu K $\alpha$ ,  $\lambda$  = 1.5406 Å) at 30 kV and 40 mA. Each sample was scanned between 4 and 32° 2 $\theta$  with a step size of 0.02°.

### 3. <sup>1</sup>H Nuclear Magnetic Resonance (NMR) Spectroscopy

<sup>1</sup>H NMR spectra were recorded on a Bruker 300MHz with DMSO as internal standard. Samples were blotted dry, crushed, and dissolved in deuterated d6-DMSO. The appropriate CH<sub>3</sub> signals were integrated to determine the relative proportions of the guests.

### References

- (1) E. Weber, S. Nitsche, A. Wierig, I. Csöregi. *Eur. J. Org. Chem.* 2002, **5**, 856.
- (2) APEX 2, Version 1.0-27; Bruker AXS Inc.; Madison, WI, 2005.
- (3) SAINT-Plus, Version 7.12; Bruker AXS Inc.: Madison, Wisconsin, USA, 2004.
- (4) G. M. Sheldrick. SADABS: Program for Area Detector Adsorption Correction; University of Göttingen: Germany, 1997; p. 33.
- (5) G. M. Sheldrick SHELX-97: Program for Crystal Structure Solution and Refinement; University of Göttingen: Germany, 1997; p. 1456.
- (6) L. J. Barbour. *J. Supramol. Chem.* 2001, **1**, 189.
- (7) M. Lusi, L. J. Barbour. *Cryst. Growth Des.*, 2011, **11**, 5515.
- (8) C. F. Macrae, I. J. Bruno, J. A. Chisholm, P. R. Edgington, P. McCabe, E. Pidcock, L. Rodriguez-Monge, R. Taylor, J. Van de Streek, P. A. Wood. Mercury CSD 3.5.1. New Features for the Visualization and Investigation of Crystal Structures. *J. Appl. Crystallogr.* 2008, **41**, 466.

#### 4. Hydrogen bonding

**Table 2.** Hydrogen bonding.

| Compound | Donor (O) | Acceptor (O)     | O...O (Å) | O-H(Å)   | O...A (Å) | <O-H...O(°) |
|----------|-----------|------------------|-----------|----------|-----------|-------------|
| <b>1</b> | O16       | O41              | 2.743(2)  | 0.967(5) | 1.785(7)  | 171(2)      |
|          | O41       | O95              | 2.707(2)  | 0.979(5) | 1.729(6)  | 177(3)      |
|          | O95       | O13              | 2.761(2)  | 0.969(5) | 1.829(10) | 161(2)      |
|          | O13       | O92              | 2.753(2)  | 0.966(5) | 1.787(5)  | 179(3)      |
|          | O92       | O16 <sup>a</sup> | 2.931(2)  | 0.946(5) | 2.080(15) | 149(2)      |
|          | O89       | O69              | 2.891(2)  | 0.955(5) | 2.033(18) | 148(3)      |
|          | O69       | O44              | 2.726(2)  | 0.968(5) | 1.770(7)  | 169(2)      |
|          | O44       | O86              | 2.646(2)  | 0.989(5) | 1.663(7)  | 172(3)      |
|          | O86       | O72              | 2.744(2)  | 0.969(5) | 1.812(11) | 160(3)      |
|          | O72       | O89 <sup>b</sup> | 2.768(2)  | 0.970(5) | 1.802(7)  | 173(3)      |
| <b>2</b> | O16       | O13              | 2.770(2)  | 0.965(5) | 1.825(8)  | 165(2)      |
|          | O13       | O16 <sup>c</sup> | 2.668(2)  | 0.971(5) | 1.745(9)  | 158(2)      |
| <b>3</b> | O16       | O41              | 2.739(2)  | 0.964(5) | 1.781(6)  | 171(2)      |
|          | O41       | O44              | 2.689(2)  | 0.978(5) | 1.713(6)  | 176(2)      |
|          | O44       | O13              | 2.766(2)  | 0.967(5) | 1.817(7)  | 166(2)      |
|          | O13       | O48              | 2.753(2)  | 0.964(5) | 1.792(6)  | 175(2)      |
|          | O48       | O16 <sup>a</sup> | 2.885(2)  | 0.948(5) | 2.03(15)  | 148(2)      |
| <b>4</b> | O13       | O20              | 2.680(2)  | 0.977(5) | 1.706(6)  | 175(2)      |
|          | O20       | O16              | 2.706(2)  | 0.977(5) | 1.736(6)  | 171(2)      |
|          | O16       | O13 <sup>d</sup> | 2.781(2)  | 0.967(5) | 1.816(6)  | 176(2)      |
| <b>5</b> | O13       | O62              | 2.674(2)  | 0.976(5) | 1.698(5)  | 178(2)      |
|          | O62       | O41              | 2.834(1)  | 0.945(5) | 1.895(6)  | 172(2)      |
|          | O41       | O16              | 2.723(2)  | 0.963(5) | 1.761(5)  | 177(2)      |
|          | O16       | O65              | 2.753(2)  | 0.964(5) | 1.799(7)  | 169(2)      |
|          | O65       | O44              | 2.853(2)  | 0.946(5) | 1.913(6)  | 172(2)      |
|          | O44       | O59              | 2.674(2)  | 0.973(5) | 1.701(5)  | 176(2)      |
|          | O59       | O13 <sup>e</sup> | 2.719(2)  | 0.964(5) | 1.759(6)  | 174(2)      |
| <b>6</b> | O16       | O47              | 2.704(2)  | 0.964(5) | 1.748(5)  | 171(2)      |
|          | O47       | O41              | 2.753(2)  | 0.968(5) | 1.790(6)  | 174(2)      |
|          | O41       | O43              | 2.672(2)  | 0.975(5) | 1.723(8)  | 163(2)      |
|          | O43       | O13              | 2.814(2)  | 0.954(5) | 1.869(9)  | 171(4)      |

Symmetry codes: (a) 1-x, 1-y, -z (a) x-1, y, z (b) x+1, y, z (c) 1-x, -y, 1-z (d) -x, 1-y, -z (e) x, y-1, z

## 5. Structure diagrams

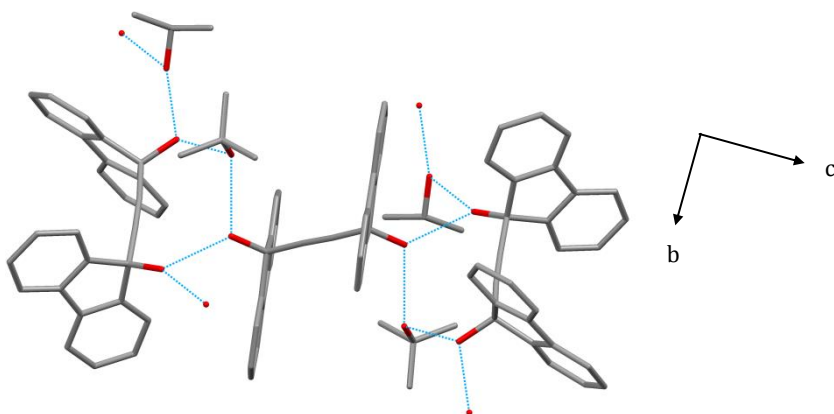

Figure 5.1: Structure **3**, grown at 50°C from an equimolar guest mixture of **2-PROP** and **t-BUT** with hydrogen bonding shown in blue. Both **2-PROP** and **t-BUT** are included.

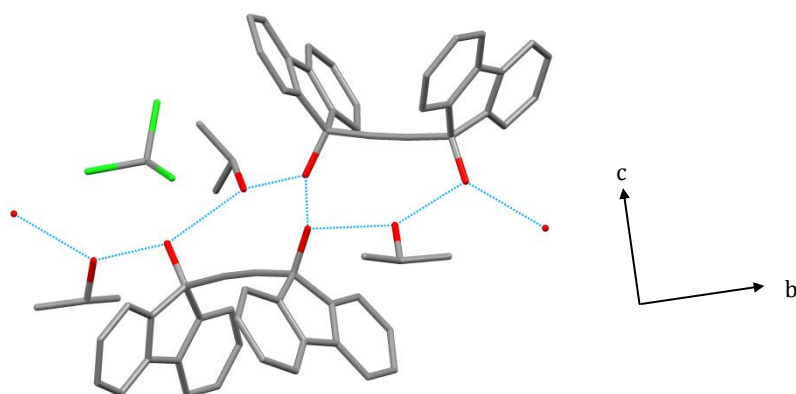

Figure 5.2: Structure **5**, grown from **2-PROP** and  $\text{CHCl}_3$  at -20°C with hydrogen bonding shown in blue.

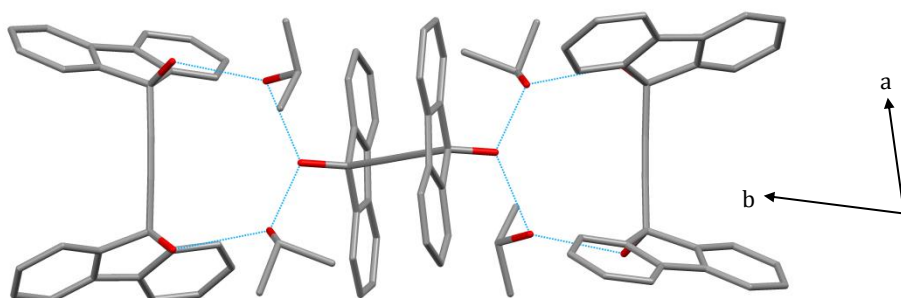

Figure 5.3: Structure **6**, grown from **2-PROP** only at -20°C, with hydrogen bonding shown in blue.

## 6. Apohost Composition

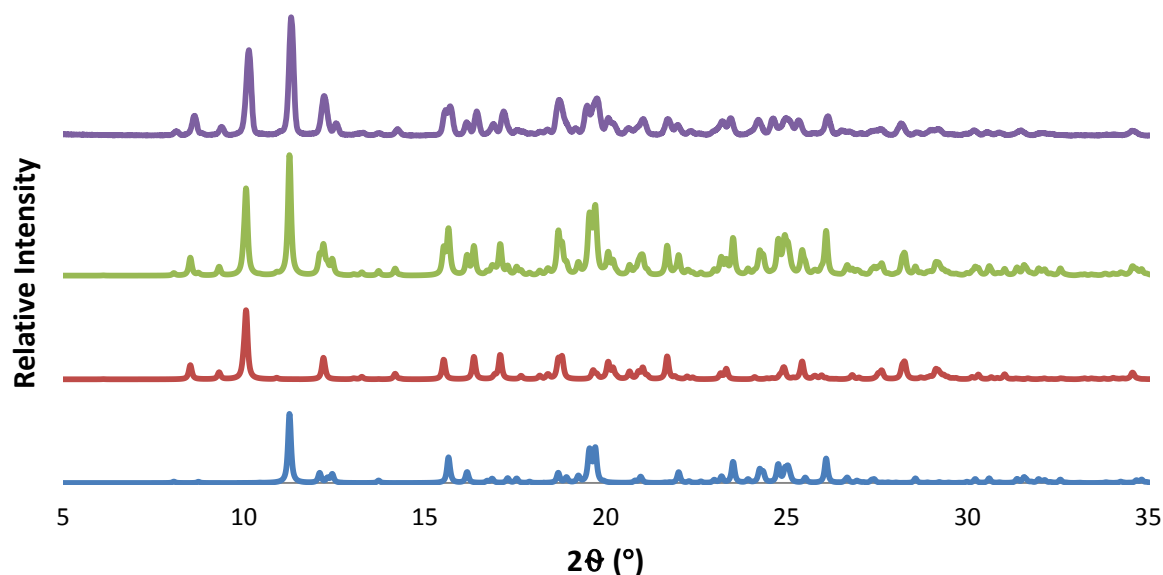

Figure 6: Structure PXRD patterns of apohost ( $\alpha$ ) (blue), apohost ( $\beta$ ) (red) and the experimental host compound from the vial, after being sieved through 106  $\mu\text{m}$  (purple). The green pattern is artificially created by summing the intensities of apohost ( $\alpha$ ) and apohost ( $\beta$ ) in a ratio of 58:42.

## 7. Packing comparisons between structures 1,3 and 6

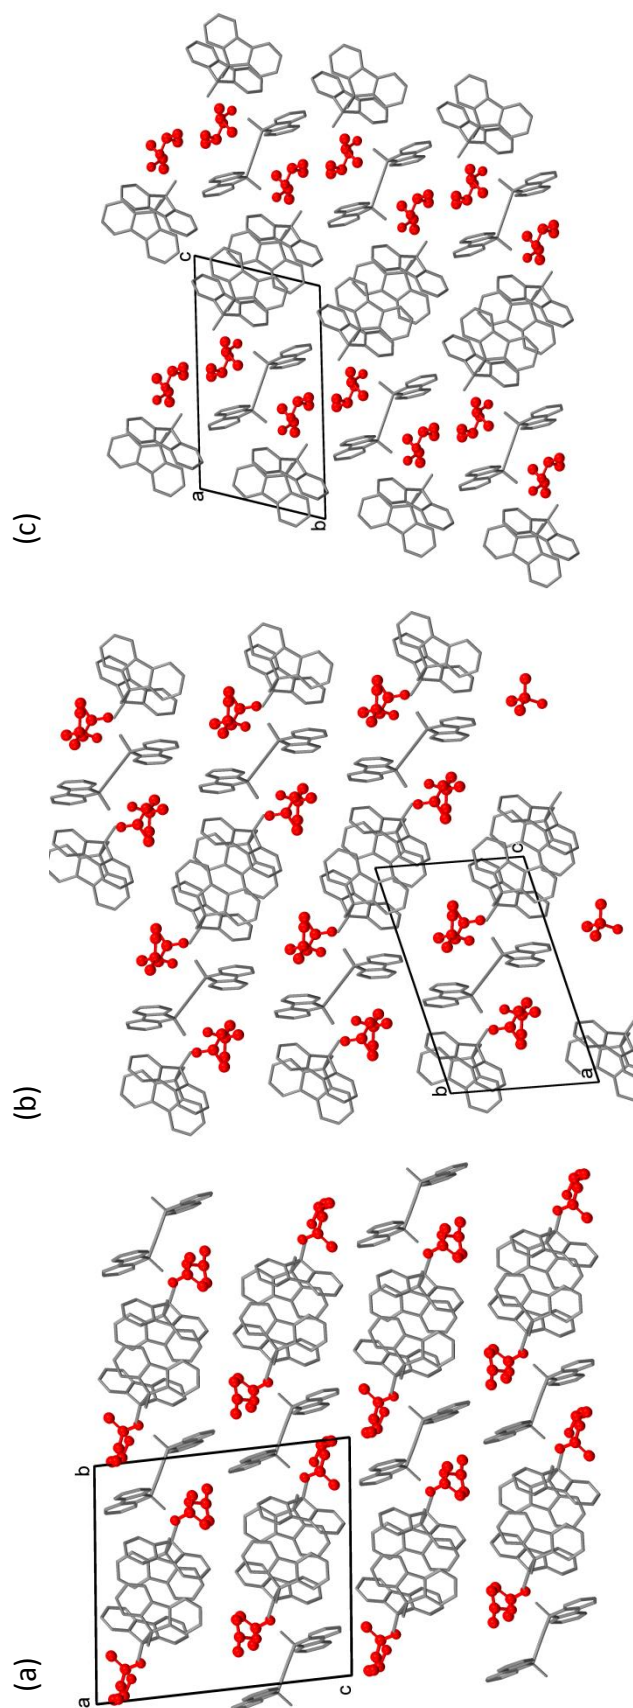

Figure 7: Structure Packing diagrams viewed down comparable directions show strong resemblances between (a) Structure 1, (b) Structure 3 and (c) Structure 6

## 8. Lattice Energy

We also computed the lattice energies of the various compounds by employing Gavezzotti's programme AA-CLP.<sup>13,14</sup> There are several problems with the calculated lattice energies firstly because the structures are not isomeric and secondly because some of the guest molecules suffer from disorder, and Professor Gavezzotti states that such results are strictly invalid.

However, we normalised the stoichiometries to that of structure 2. What is relevant is that structure **2** (phase II) yielded  $-357.0 \text{ kJ}\cdot\text{mol}^{-1}$  while structure **3** (phase I) gave  $-341.6 \text{ kJ}\cdot\text{mol}^{-1}$ , a difference of  $15.4 \text{ kJ}\cdot\text{mol}^{-1}$ , which is not significant.

**Table 3.** Lattice Energies

| Structure | Molar mass<br>(g/mol) | Calculated<br>Lattice Energy<br>(kJ/mol) | Normalized<br>Lattice Energy<br>relative to<br>structure 2<br>(kJ/mol) | Normalised<br>$E_{\text{structure } i} - E_{\text{structure } 2}$<br>$i = 1-6$ (kJ/mol) |
|-----------|-----------------------|------------------------------------------|------------------------------------------------------------------------|-----------------------------------------------------------------------------------------|
| 1         | 1399.74               | -906.5                                   | -346.3                                                                 | +10.7                                                                                   |
| 2         | 534.70g               | -357.0                                   | -357.0                                                                 | 0                                                                                       |
| 3         | 1427.79               | -912.1                                   | -341.6                                                                 | +15.4                                                                                   |
| 4         | 682.94                | -520.5                                   | -407.5                                                                 | -50.5                                                                                   |
| 5         | 1072.57               | -680.4                                   | -339.2                                                                 | +17.8                                                                                   |
| 6         | 1399.74               | -877.8                                   | -335.3                                                                 | +21.7                                                                                   |

## 9. Representative Inclusion Experiments

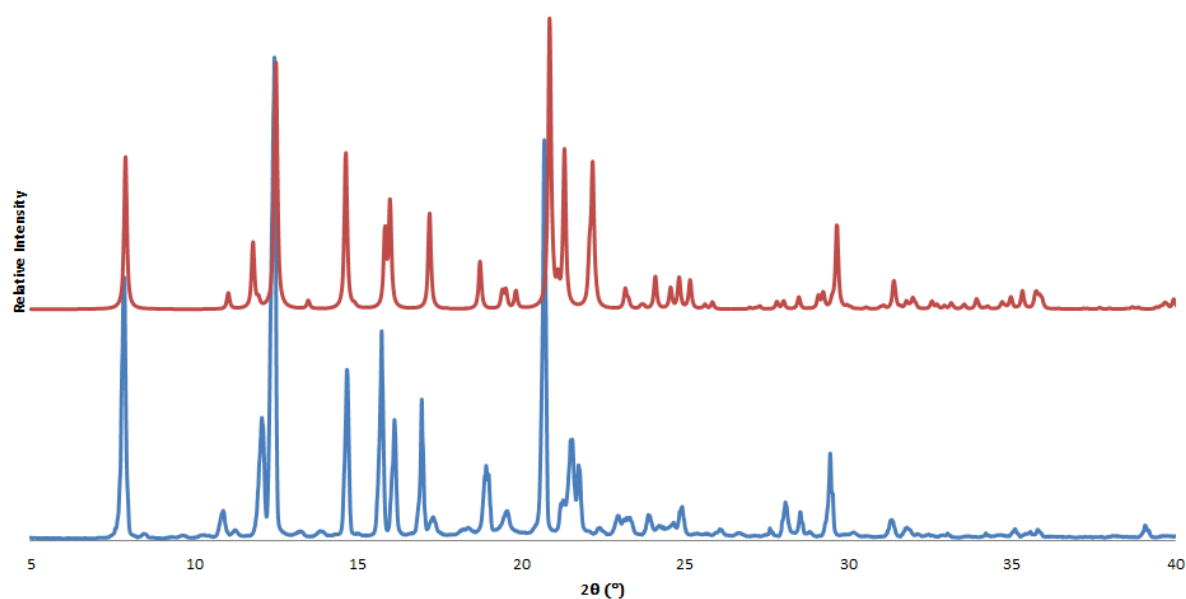

Figure 9.1. PXRD pattern of structure **2** (blue) grown from the single guest at 50°C and predicted PXRD of **2** (red)

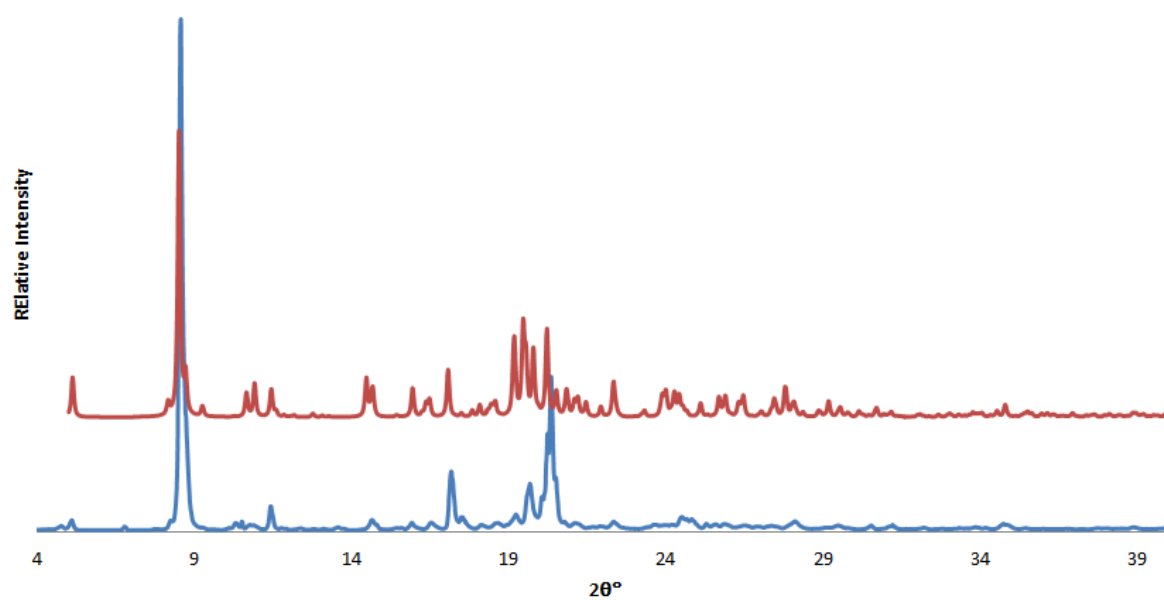

Figure 9.2. PXRD pattern of structure **1** (blue) grown from the single 2-propanol guest at 30 °C and simulated PXRD pattern of **1** (red)



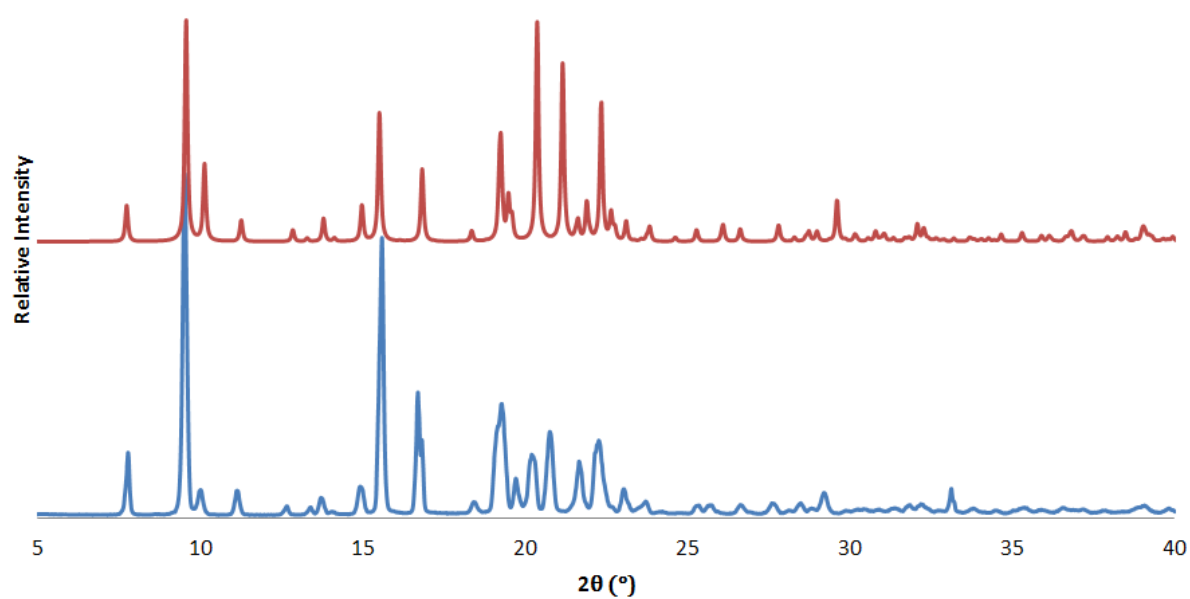

Figure 9.3. PXRD pattern of structure **4** (blue), grown from the single tertiary butanol guest at 30°C and predicted PXRD pattern of **4** (red)

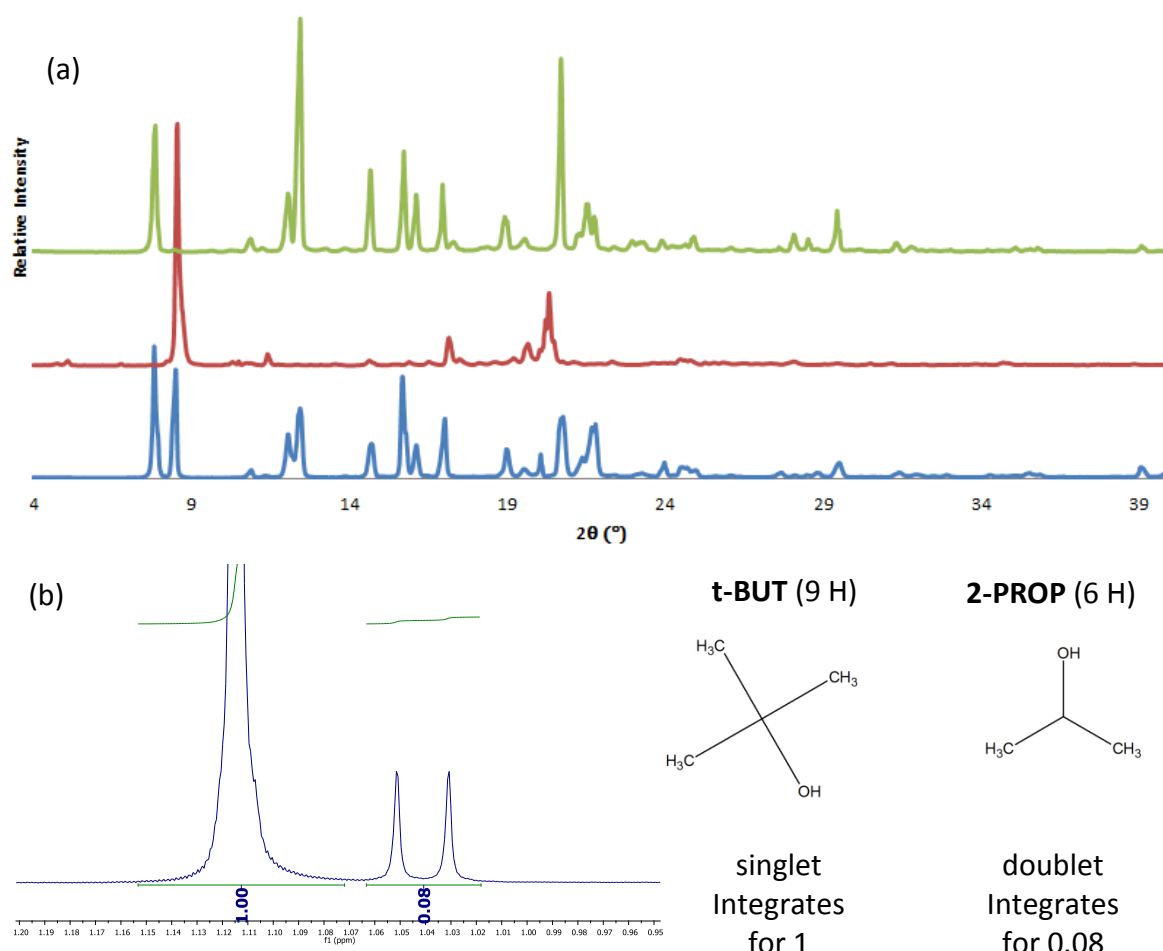

Figure 9.4. (a) PXRD pattern of the result of the equimolar competition carried out at 30°C (blue), predicted PXRD pattern of **3** (red) and PXRD pattern of **2** at 50°C (green) and (b) CH<sub>3</sub> region of <sup>1</sup>H NMR spectrum showing **t-BUT** integrating for 1 and **2-PROP** integrating for 0.08 indicating 10.7% 2-propanol in the mixture.

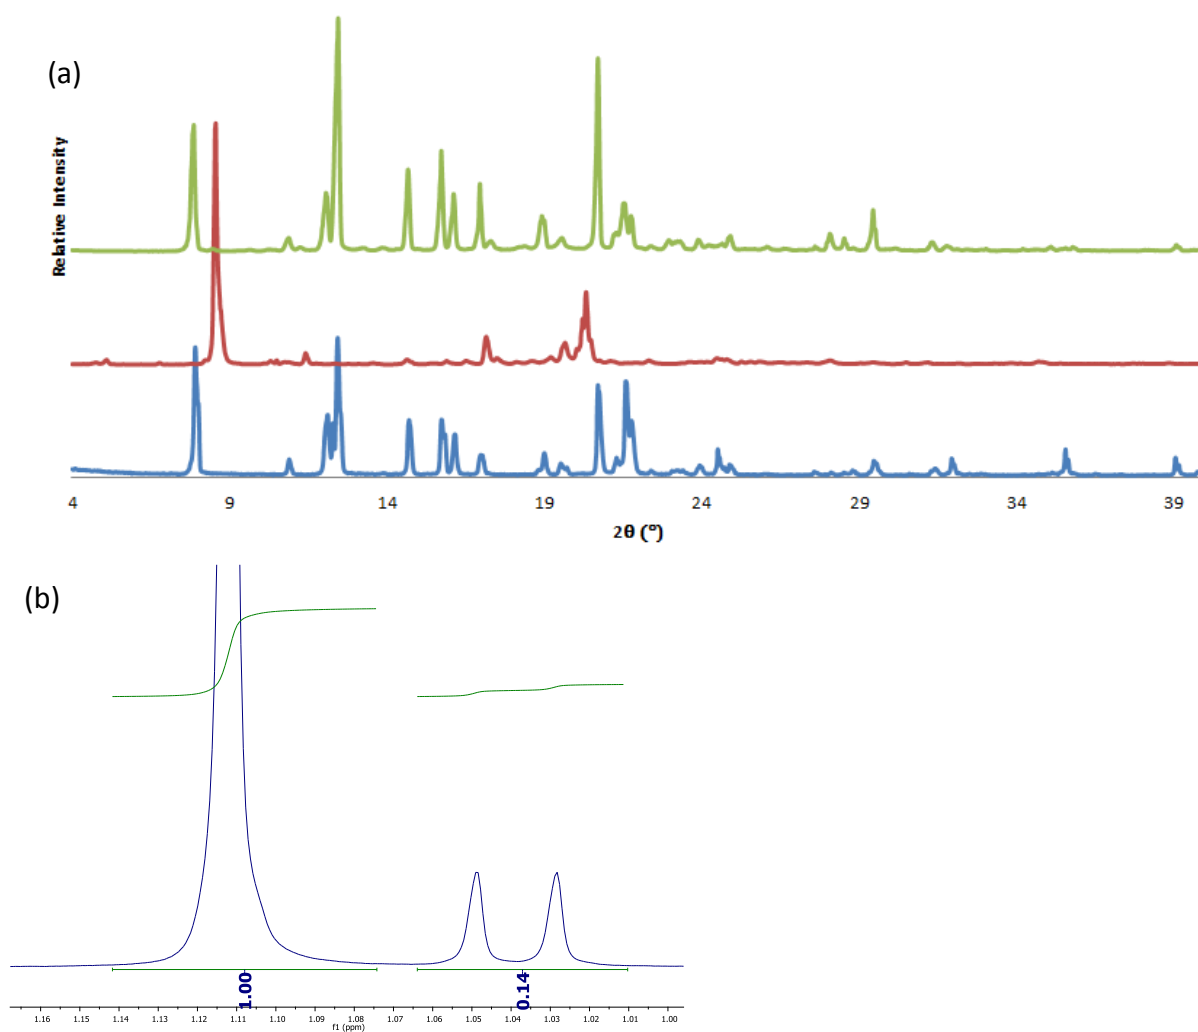

Figure 9.5. a) PXRD pattern of the result of the equimolar competition carried out at 30°C(blue), predicted PXRD pattern of **3** (red) and PXRD pattern of **2** at 50°C (green) and (b)  $\text{CH}_3$  region of  $^1\text{H}$  NMR spectrum showing **t-BUT** integrating for 1 and **2-PROP** integrating for 0.14 indicating 17.4% 2-propanol in the mixture.

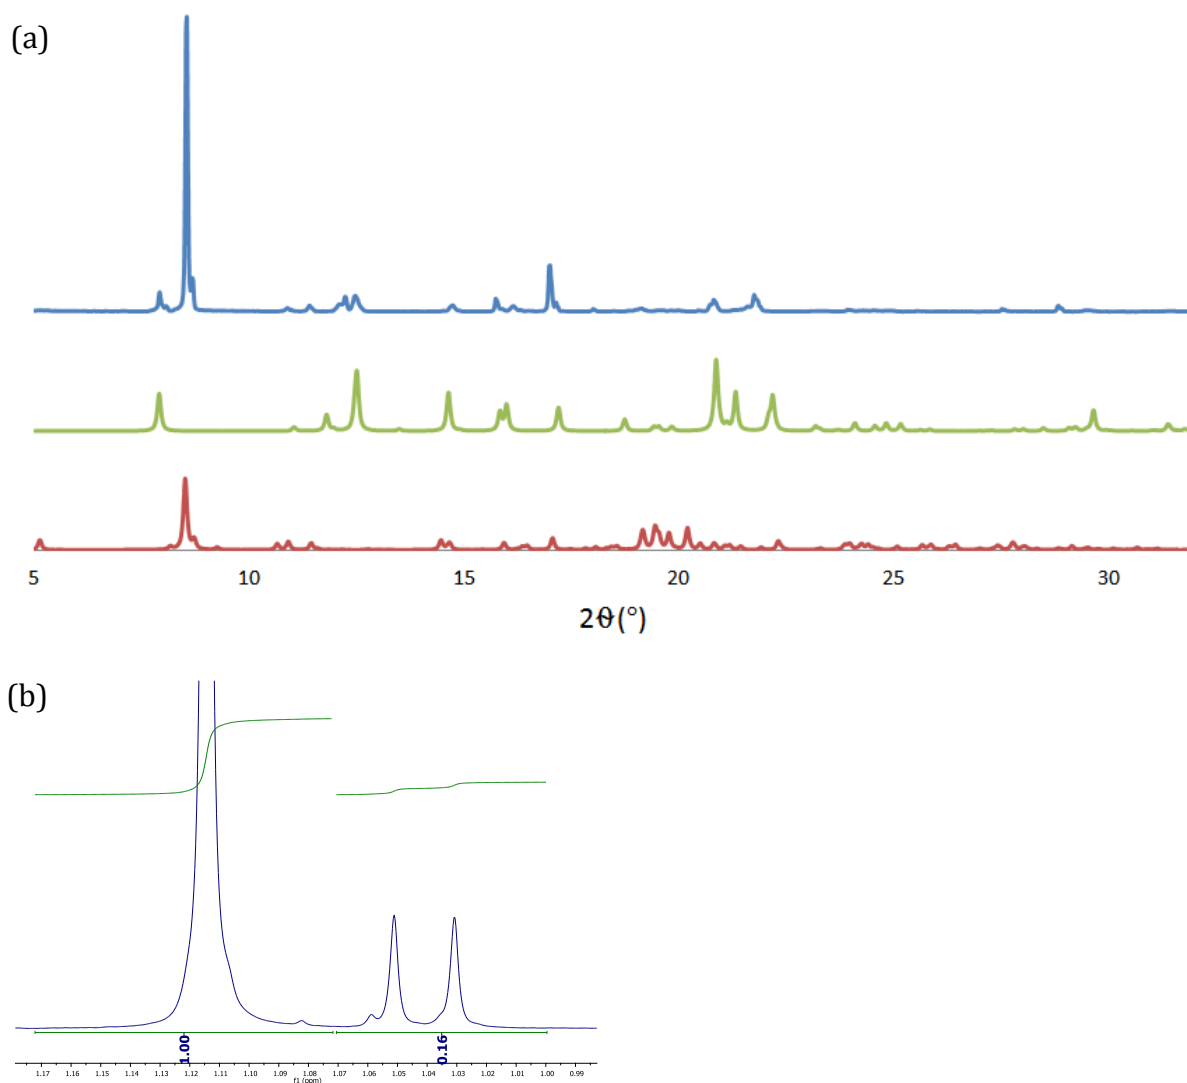

Figure 9.6. (a) PXRD pattern of the result of the equimolar competition carried out at 30°C (blue), predicted PXRD pattern of **3** (red) and PXRD pattern of **2** at 50°C (green) and (b)  $\text{CH}_3$  region of  $^1\text{H}$  NMR spectrum showing **t-BUT** integrating for 1 and **2-PROP** integrating for 0.016 indicating 19.4% 2-propanol in the mixture.

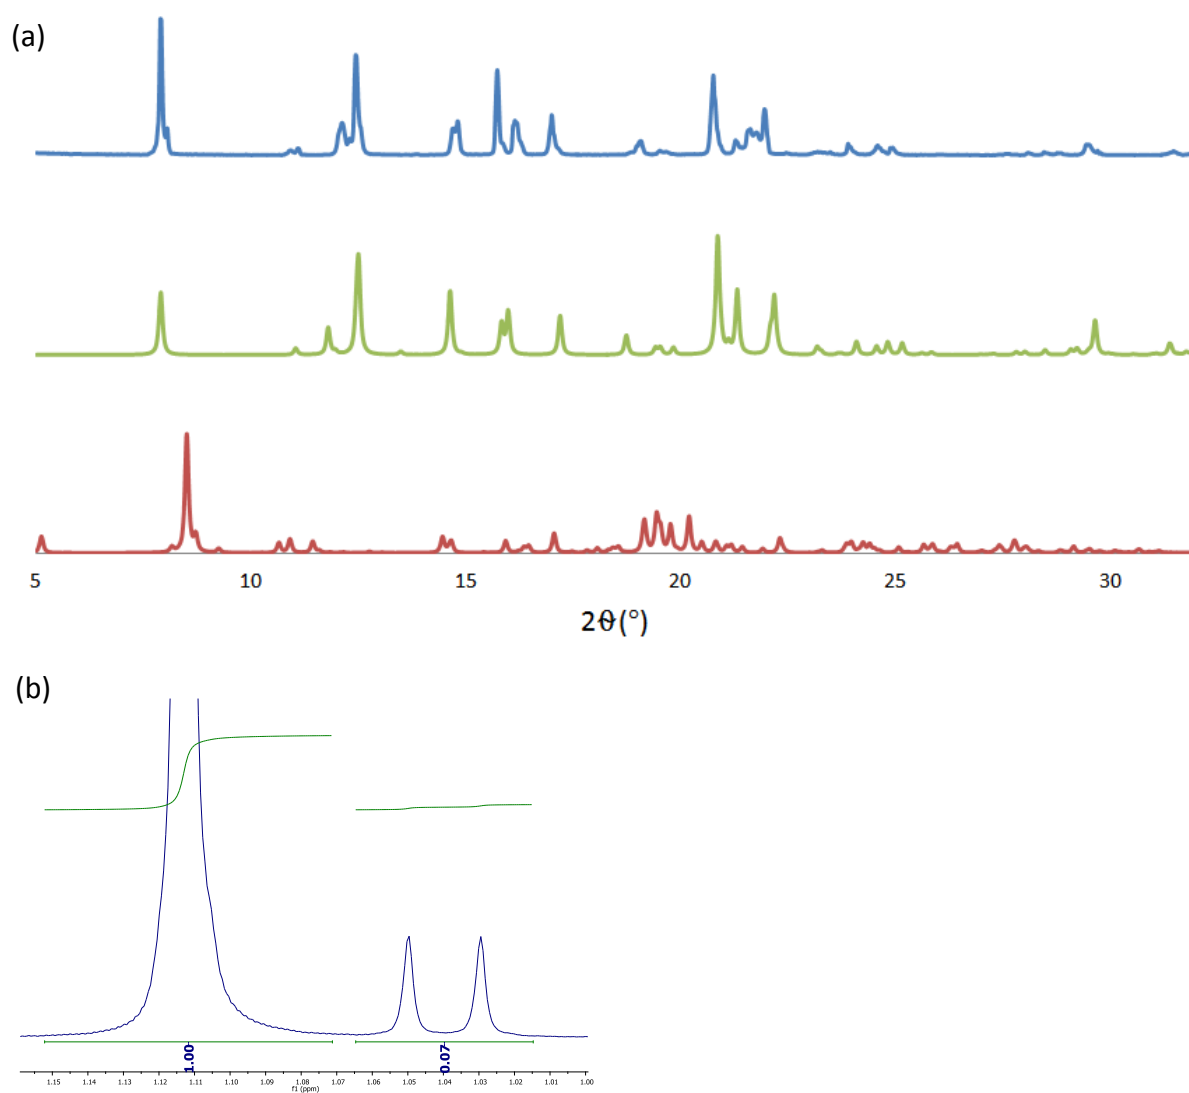

Figure 9.7. (a) PXRD pattern of the result of the equimolar competition carried out at 30°C (blue), predicted PXRD pattern of **3** (red) and PXRD pattern of **2** at 50°C (green) and (b) CH<sub>3</sub> region of <sup>1</sup>H NMR spectrum showing **t-BUT** integrating for 1 and **2-PROP** integrating for 0.07 indicating 9.5% 2-propanol in the mixture.

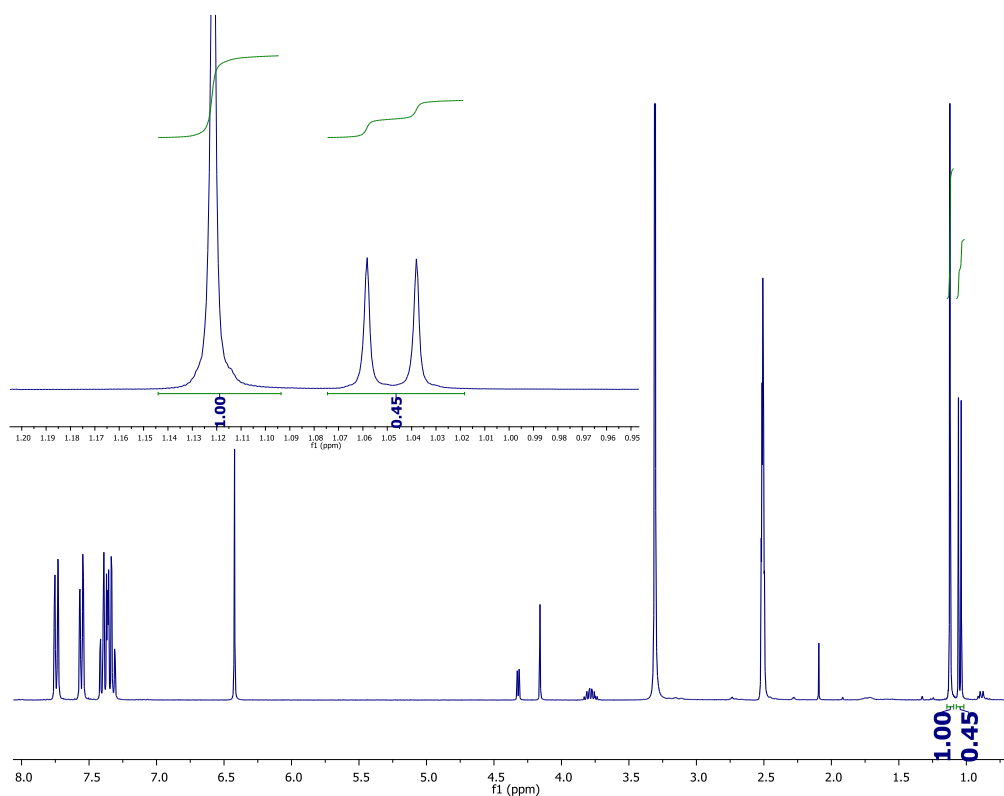

Figure 9.8.  $^1\text{H}$  NMR spectrum of the crystals grown at  $30^\circ\text{C}$  from an equimolar mixture of **2-PROP** and **t-BUT** showing **t-BUT** integrating for 1 and **2-PROP** integrating for 0.45 indicating 40.3% **2-PROP** in the mixture.

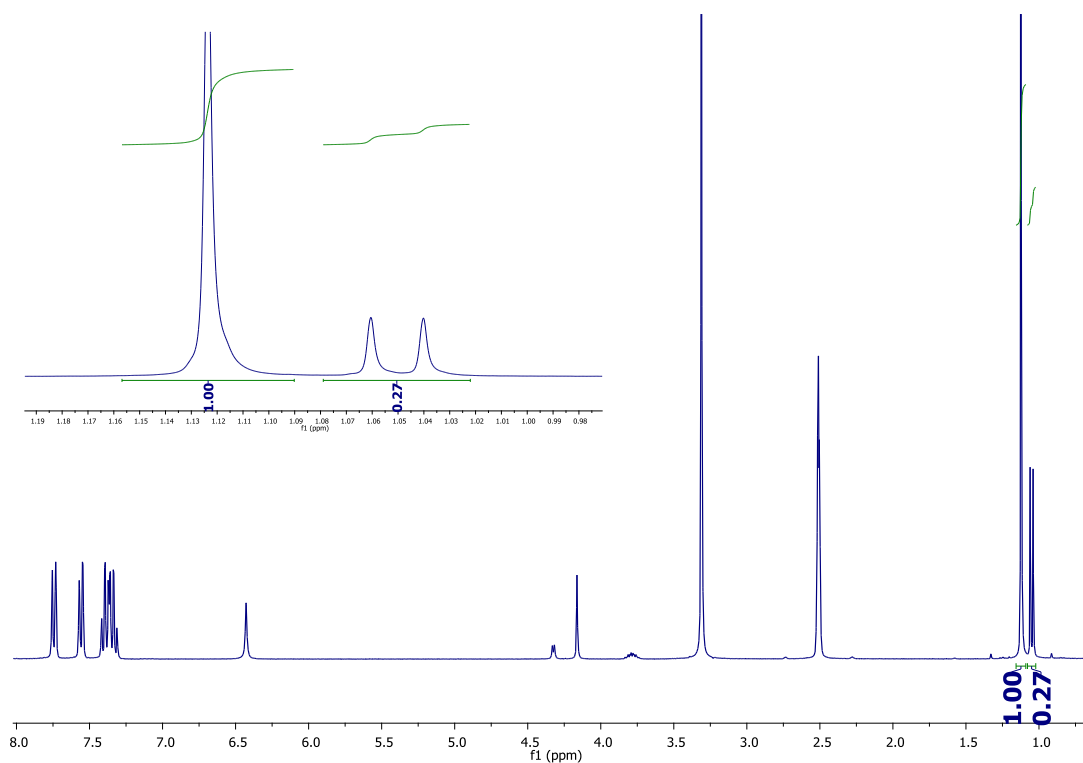

Figure 9.9:  $^1\text{H}$  NMR spectrum of the crystals grown at  $30^\circ\text{C}$  from an equimolar mixture of **2-PROP** and **t-BUT** showing **t-BUT** integrating for 1 and **2-PROP** integrating for 0.27 indicating 28.8% **2-PROP** in the mixture.

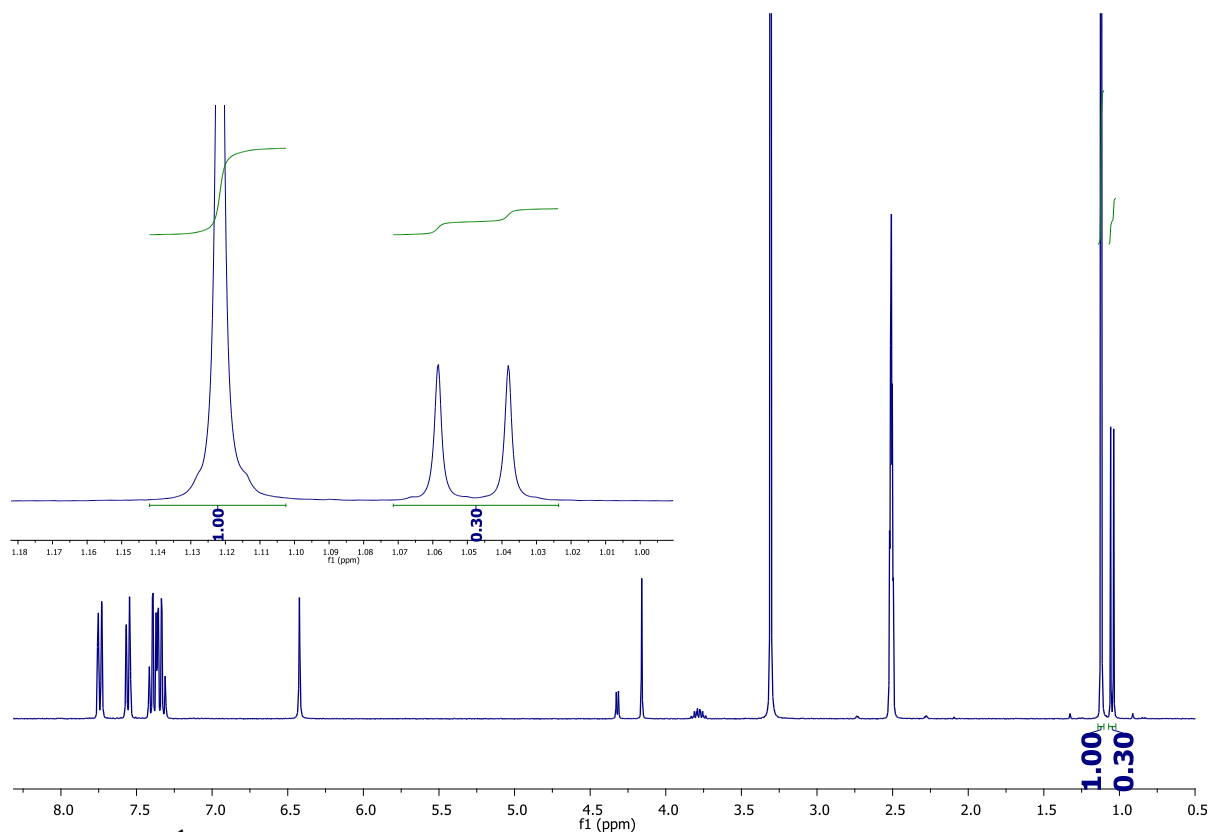

Figure 9.10.  $^1\text{H}$  NMR spectrum of the crystals grown at  $30^\circ\text{C}$  from an equimolar mixture of **2-PROP** and **t-BUT** showing **t-BUT** integrating for 1 and **2-PROP** integrating for 0.30 indicating 31 % **2-PROP** in the mixture.

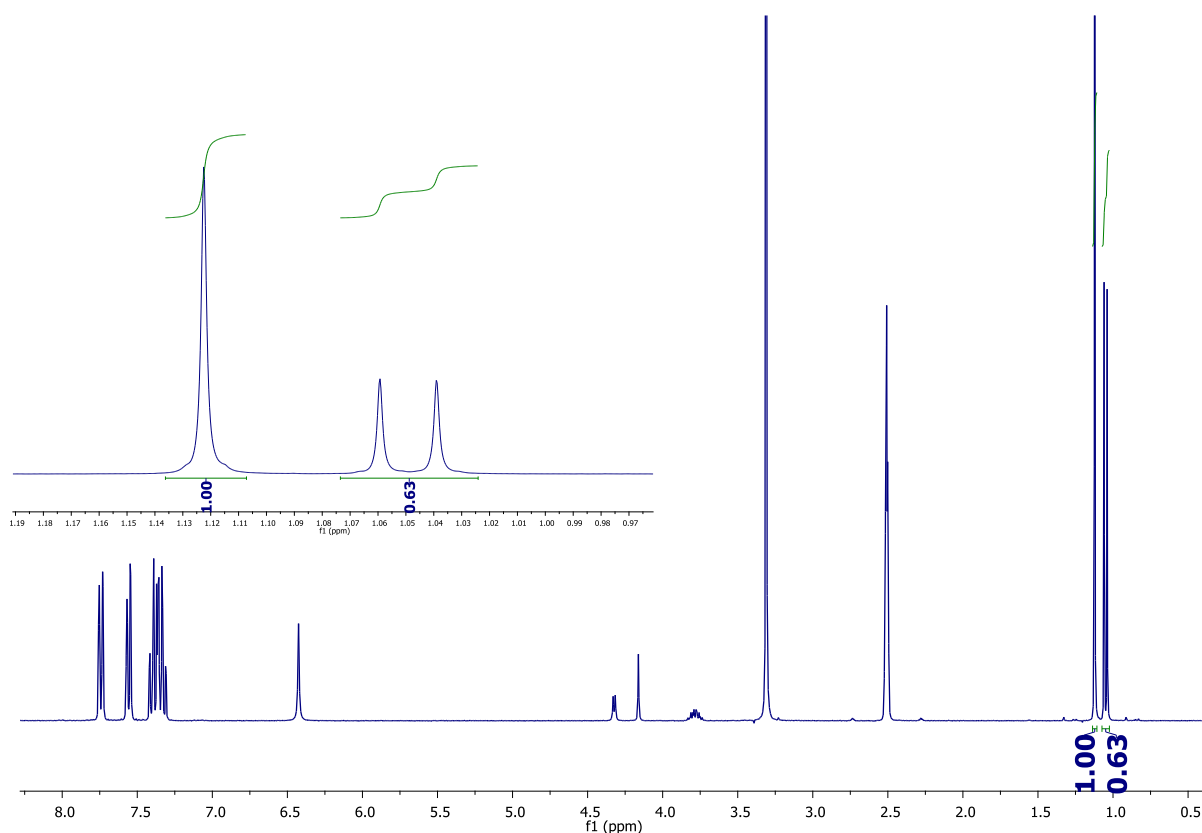

Figure 9.11.  $^1\text{H}$  NMR spectrum of the crystals grown at  $30^\circ\text{C}$  from an equimolar mixture of **2-PROP** and **t-BUT** showing **t-BUT** integrating for 1 and **2-PROP** integrating for 0.63 indicating 48.6 % **2-PROP** in the mixture.

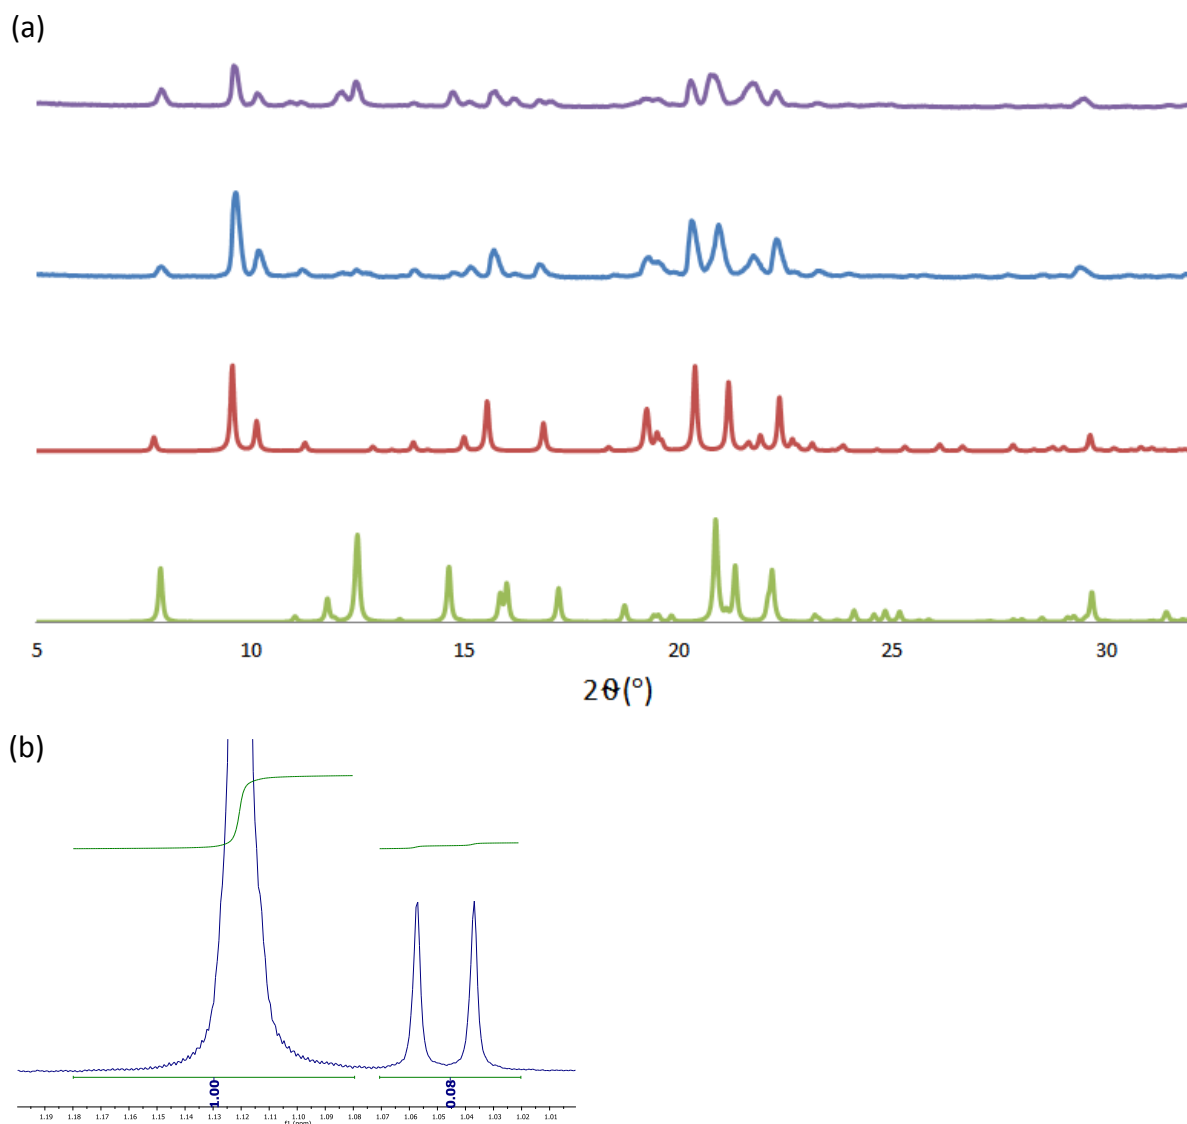

Figure 9.12. (a) PXRD pattern of the result of the equimolar competition carried out at  $-61^\circ\text{C}$ . The blue trace is the resulting powder diffractogram and the purple trace is the diffractogram collected immediately afterwards. This is compared to the predicted PXRD pattern of **2** (green) and predicted PXRD pattern of **3** (red) and (b)  $\text{CH}_3$  region of  $^1\text{H}$  NMR spectrum showing **t-BUT** integrating for 1 and **2-PROP** integrating for 0.08 indicating 10.7% **2-PROP** in the mixture.



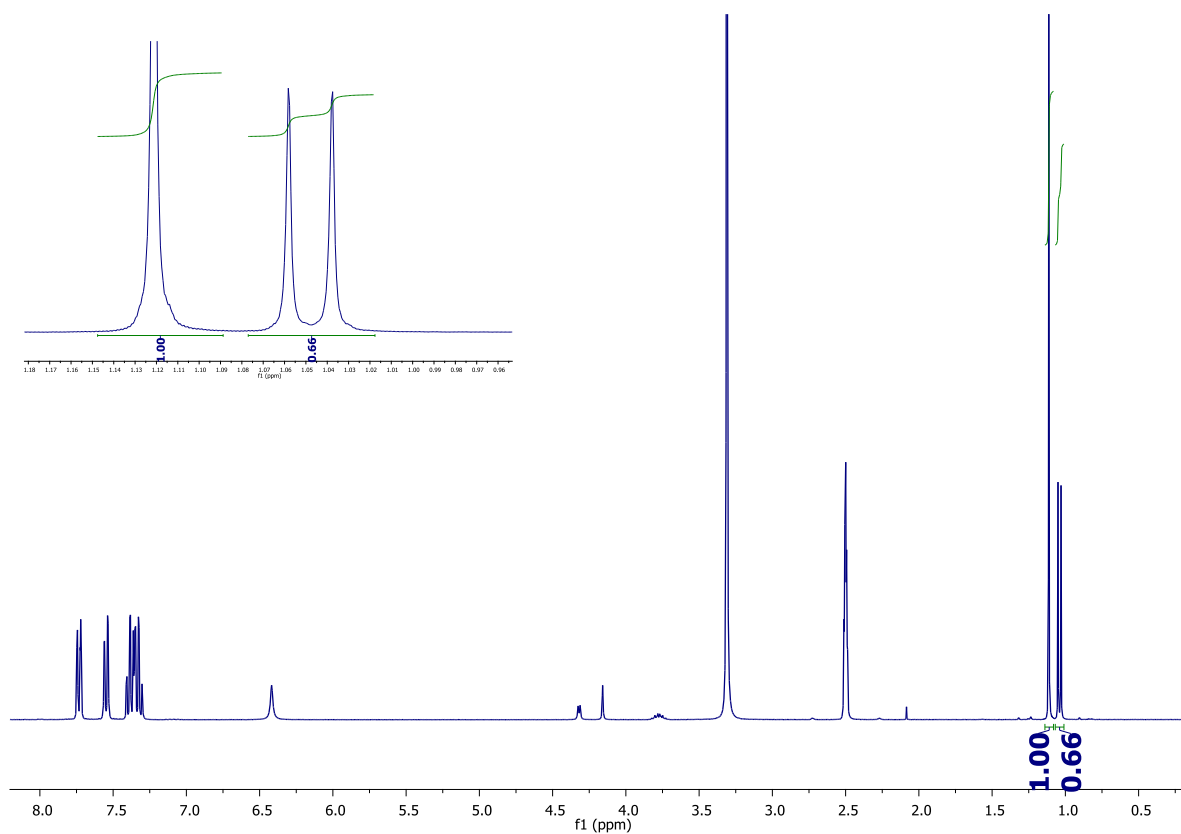

Figure 9.13.  $^1\text{H}$  NMR spectrum of the crystals grown at  $50^\circ\text{C}$  from an equimolar mixture of **2-PROP** and **t-BUT** showing **t-BUT** integrating for 1 and **2-PROP** integrating for 0.66 indicating 49.7% **2-PROP** in the mixture.

## 10. Hirshfeld Analysis

We studied the packing of all the structures using the programme Crystal Explorer.<sup>12</sup> In each case we targeted the host molecule and analysed the non-bonded interactions, but the only significant differences were those between the *cis*- versus the *trans*- host molecules. This was expected and yielded no fresh insights into the mechanism of selectivity.

### Hosts selected as target in all cases:

#### Structure 1

##### *trans*-

|      | Out % |      |     |
|------|-------|------|-----|
| In % | C     | H    | O   |
| C    | 0.2   | 26.5 | 0.3 |
| H    | 3.3   | 59.8 | 5.4 |
| O    | 0.2   | 4.4  | 0   |

$d_i + d_e$

① 1.632

② 2.092

③ 1.757

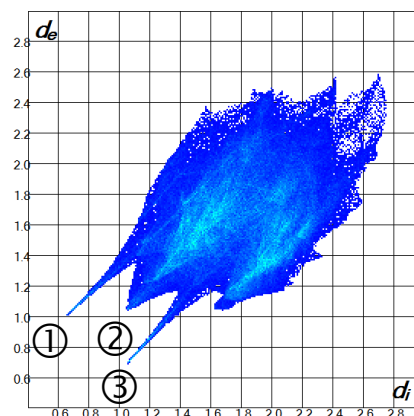

##### *cis* $\alpha$ -

|      | Out % |      |     |
|------|-------|------|-----|
| In % | C     | H    | O   |
| C    | 4.2   | 22.5 | 0.6 |
| H    | 19.2  | 45.1 | 3.4 |
| O    | 0.2   | 4.7  | 0   |

$d_i + d_e$

① 1.747

② 2.097

③: 1.787

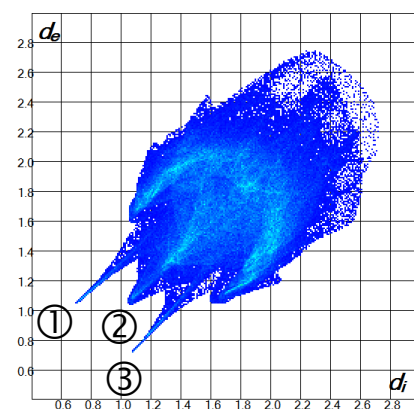

*cis*  $\beta$ -

|      | Out % |      |     |
|------|-------|------|-----|
| In % | C     | H    | O   |
| C    | 4.4   | 22.6 | 0.2 |
| H    | 20.4  | 44.1 | 3.3 |
| O    | 0.3   | 4.7  | 0   |

$d_i + d_e$

- ① 1.752
- ② 2.313
- ③ 1.807

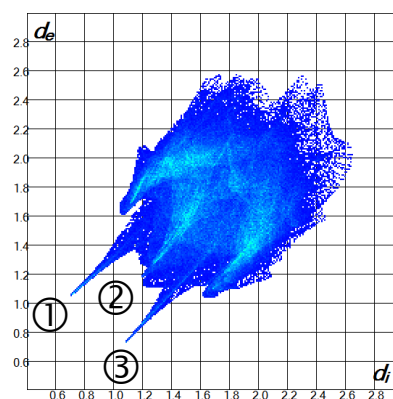

Structure 2

*trans*-

|      | Out % |      |     |
|------|-------|------|-----|
| In % | C     | H    | O   |
| C    | 0     | 26.7 | 0   |
| H    | 5.8   | 59.4 | 4.0 |
| O    | 0     | 4.2  | 0   |

- ① 1.732
- ② 2.369
- ③ 1.792

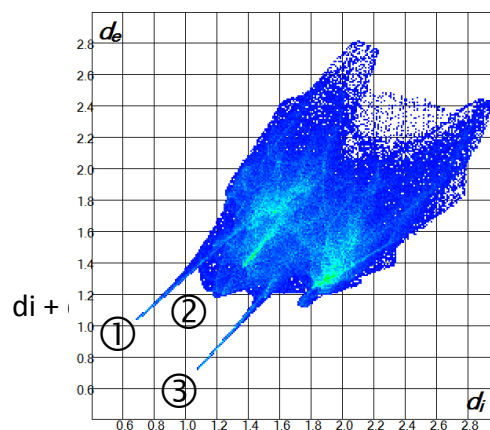

Structure 3 (major component of disordered guest selected only)

*trans*-

|      | Out % |      |     |
|------|-------|------|-----|
| In % | C     | H    | O   |
| C    | 0.3   | 26.2 | 0.3 |
| H    | 5.8   | 57.3 | 5.3 |
| O    | 0.2   | 4.5  | 0   |

$d_i + d_e$

- ① 1.697
- ② 2.098
- ③ 1.752

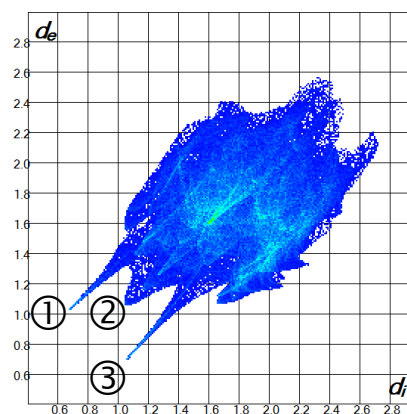

*cis-*

|      | Out % |      |     |  |
|------|-------|------|-----|--|
| In % | C     | H    | O   |  |
| C    | 4.1   | 22.5 | 0.2 |  |
| H    | 19.8  | 45.1 | 3.4 |  |
| O    | 0.1   | 4.8  | 0   |  |

di + de

- ① 1.747
- ② 2.239
- ③ 1.793

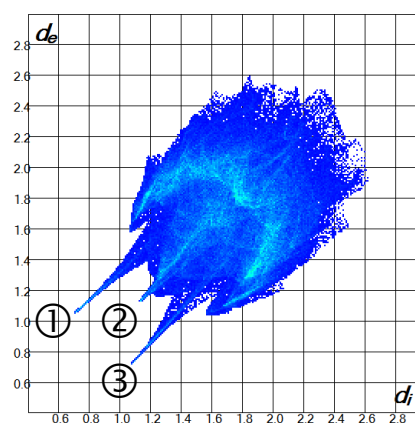

Structure 4

*trans-*

|      | Out % |      |     |  |
|------|-------|------|-----|--|
| In % | C     | H    | O   |  |
| C    | 0     | 26.1 | 0.5 |  |
| H    | 3.1   | 62.6 | 3.1 |  |
| O    | 0     | 4.6  | 0   |  |

di + de

- ① 1.682
- ② 2.189
- ③ 1.798

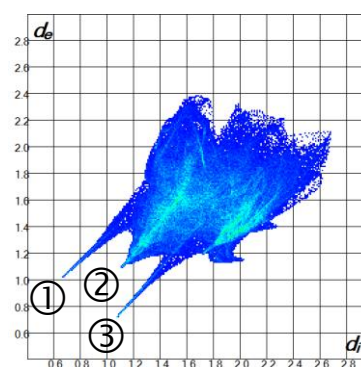

Structure 5

*cis- α*

|      | Out % |      |     |     |  |
|------|-------|------|-----|-----|--|
| In % | C     | H    | O   | Cl  |  |
| C    | 2.2   | 24.2 | 0   | 0.4 |  |
| H    | 9.4   | 52.2 | 4.5 | 2.0 |  |
| O    | 0     | 5.0  | 0   | 0   |  |

- ① 1.677
- ② 2.257
- ③ 1.857

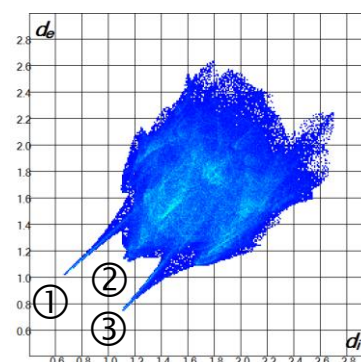

*cis-β*

|      | Out % |      |     |     |
|------|-------|------|-----|-----|
| In % | C     | H    | O   | Cl  |
| C    | 3.6   | 18.7 | 0   | 4.3 |
| H    | 0.1   | 49.7 | 4.1 | 5.6 |
| O    | 0     | 4.8  | 0   | 0.2 |

di + de

① 1.677

② 2.187

③ 1.732

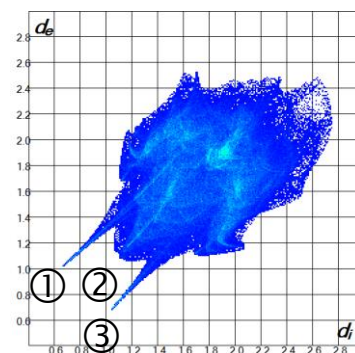

Structure 6 (major component of disordered guests selected only)

*trans-*

|      | Out % |      |     |
|------|-------|------|-----|
| In % | C     | H    | O   |
| C    | 0     | 27.5 | 0   |
| H    | 5.3   | 53.5 | 8.3 |
| O    | 0     | 5.3  | 0   |

di + de

① 1.692

② 2.212

③ 1.767

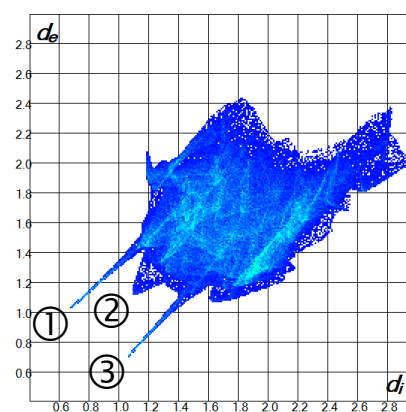

*cis-*

|      | Out % |      |     |
|------|-------|------|-----|
| In % | C     | H    | O   |
| C    | 4.4   | 22.8 | 0   |
| H    | 17.7  | 47.0 | 2.8 |
| O    | 0     | 5.2  | 0   |

di + de

① 1.717

② 2.267

③ 1.838

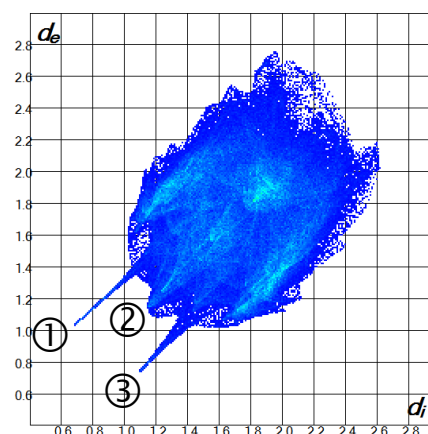

## 11. Kinetics of *In Situ* PXRD Vapour Sorption (Experiment 1)

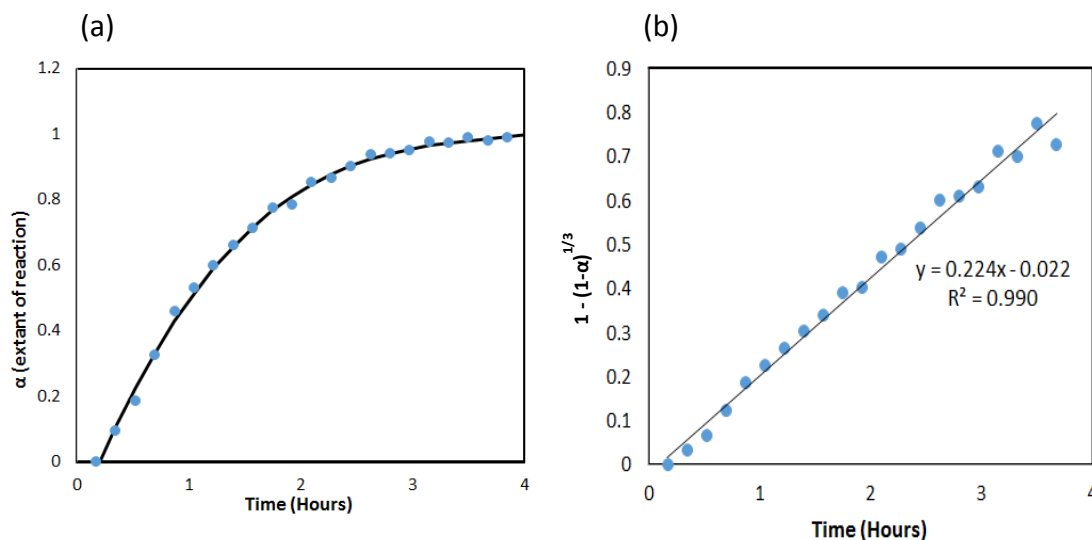

Figure 11. Experiment 1 (a) plot of extent of reaction vs time and (b) data fitted to the contracting volume equation:  $1 - (1 - \alpha)^{1/3} = k t$ , yielding a rate constant of  $3.7 \times 10^{-3} \text{ min}^{-1}$ , corresponding to a half-life of 55.4 min.

## 12. Relevant Thermal Analysis

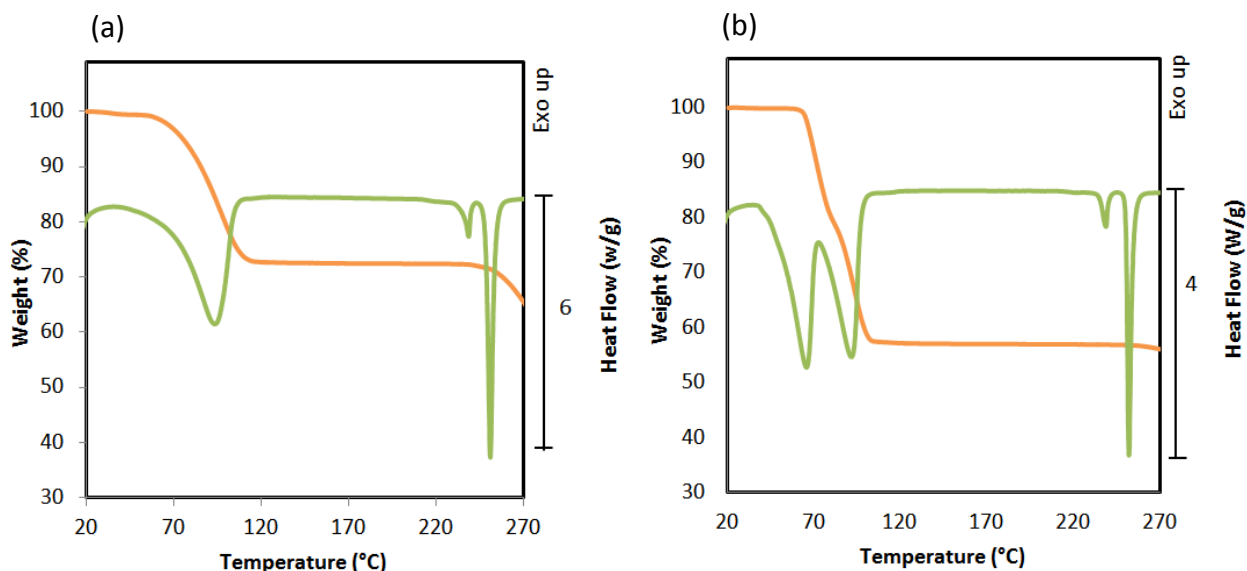

Figure 12. Thermal gravimetric (orange) and Differential Scanning Calorimetry (green) traces of (a) structure 2, phase II (TGA: 27.5% experimental, 27.9% calculated) and (b) structure 4, phase III (TGA: 42.9% experimental, 43.4%)
